# Supplementary material for: Baroreflex gain and time of pressure decay at different body temperatures in the tegu lizard, Salvator merianae
Source: PLoS One. 2020 Nov 23;15(11):e0242346. doi: 10.1371/journal.pone.0242346 (PMC7682859; doi:10.1371/journal.pone.0242346)
Supplement: S2 Data — (CSV) [file pone.0242346.s002.csv]

Variable	Heart rate (BPM)			Pulse Interval (s)			Systolic pressure (kPa)			Diastolic pressure (kPa)			Mean pressure (kPa)			Pulse pressure (kPa)			Gain (s/kPa)			Normalized gain				BEI			Tau (s)			Tau/PI		Oscillatory power fraction
Temperature (C)	15	25	35	15	25	35	15	25	35	15	25	35	15	25	35	15	25	35	15	25	35	15	25	35	15	25	35	15	25	35	15	25	35	15	25	35
Individual
1	9.57	11.72	26.48	6.27	5.12	2.27	5.63	6.23	5.04	3.20	3.66	3.01	4.01	4.52	3.69	2.43	2.57	2.03	11.62	15.49	2.06	7.43	13.67	3.35	0.35	0.39	0.37	4.33	4.24	2.58	0.69	0.83	1.14	0.29	0.27	0.27
2	11.94	21.75	28.34	5.02	2.76	2.12	4.42	5.36	6.74	4.04	4.14	4.98	4.17	4.55	5.57	0.38	1.23	1.76	7.02	13.44	2.48	5.82	22.16	6.52	0.37	0.45	0.36	8.86	0.94	1.80	1.76	0.34	0.85	0.06	0.15	0.17
3	8.99	10.79	31.58	6.67	5.56	1.90	7.55	5.51	7.27	5.61	3.41	5.67	6.26	4.11	6.20	1.94	2.10	1.61	5.06	7.59	2.34	4.75	5.61	7.65	0.53	0.35	0.45	7.55	6.10	4.08	1.13	1.10	2.15	0.17	0.25	0.15
4	9.20	38.15	44.62	6.52	1.57	1.34	5.12	7.70	6.17	3.52	6.02	4.59	4.05	6.58	5.11	1.60	1.68	1.58	7.31	2.67	1.26	4.54	11.16	4.78	0.54	0.41	0.36	7.26	2.43	2.51	1.11	1.54	1.86	0.21	0.15	0.17
5	11.49	31.21	62.39	5.22	1.92	0.96	5.62	6.72	11.35	4.03	5.00	8.51	4.56	5.57	9.46	1.58	1.72	2.84	4.29	2.78	0.67	3.75	8.05	6.56	0.29	0.19	0.30	10.45	2.80	0.50	2.00	1.46	0.52	0.19	0.17	0.17
6	12.62	21.98	45.52	4.75	2.73	1.32	5.38	6.89	6.33	3.86	5.22	5.06	4.37	5.78	5.49	1.52	1.66	1.27	5.14	2.09	1.41	4.72	4.42	5.85	0.49	0.27	0.25	3.92	1.53	0.94	0.82	0.56	0.71	0.19	0.16	0.13
7	12.24	16.94		4.90	3.54		5.18	6.02		3.86	4.56		4.30	5.05		1.32	1.46		3.91	3.87		3.43	5.51		0.55	0.14		4.55	2.61		0.93	0.74		0.17	0.16
8	17.84	37.65	85.36	3.36	1.59	0.70	7.27	8.80	6.38	4.71	6.54	4.68	5.56	7.29	5.25	2.56	2.26	1.70	2.40	0.90	0.47	3.97	4.11	3.48	0.62	0.53	0.44	3.83	2.51	1.80	1.14	1.57	2.57	0.23	0.17	0.18
9	10.23	23.45	30.53	5.87	2.56	1.96	7.36	8.17	6.77	4.65	5.45	4.12	5.55	6.36	5.01	2.71	2.72	2.65	4.86	2.74	1.57	4.60	6.81	4.00	0.34	0.13	0.46	6.19	2.65	2.13	1.06	1.03	1.08	0.25	0.22	0.26
10	14.32	16.17	25.32	4.19	3.71	2.37	9.44	9.06	8.57	6.38	5.59	5.49	7.40	6.75	6.52	3.06	3.47	3.08	2.37	1.18	1.26	4.19	2.14	3.47	0.23	0.38	0.23	1.54	1.99	1.77	0.37	0.54	0.75	0.22	0.26	0.24
11	22.73	17.50	47.30	2.64	3.43	1.27	5.73	7.43	7.73	3.99	4.91	5.34	4.57	5.75	6.14	1.74	2.52	2.39	6.09	2.27	1.70	10.56	3.81	8.21	0.36	0.19	0.47	6.07	4.06	1.14	2.30	1.18	0.89	0.20	0.23	0.21
Mean	12.83	22.48	42.74	5.04	3.14	1.62	6.24	7.08	7.24	4.35	4.95	5.15	4.98	5.66	5.84	1.89	2.13	2.09	5.46	5.00	1.52	5.25	7.95	5.39	0.42	0.31	0.37	5.87	2.90	1.92	1.21	0.99	1.25	0.20	0.20	0.19
Standard deviation	4.17	9.49	19.10	1.28	1.32	0.58	1.47	1.27	1.73	0.94	0.96	1.41	1.09	1.03	1.50	0.76	0.66	0.61	2.60	5.02	0.66	2.07	5.80	1.82	0.13	0.14	0.09	2.56	1.43	1.01	0.58	0.43	0.69	0.06	0.05	0.05
